# Supplementary material for: A supercritical relaxor phase boundary for ultrahigh electrostrictive properties
Source: Royal Society of Chemistry journal article supplement (doi:10.1039/d3qi01636f), 2023-01-01
Supplement: d3qi01636f1.pdf [file d3qi01636f1.pdf]

## Supporting Information

### Supercritical relaxor phase boundary for ultrahigh electrostrictive properties

Qinghu Guo,<sup>a</sup> Dongxu Li,<sup>b</sup> Zhonghua Yao,<sup>b</sup> Huajun Sun,<sup>b</sup> Hua Hao,<sup>\*a,b</sup> Hanxing Liu<sup>b</sup> and Shujun Zhang<sup>\*c</sup>

<sup>a</sup> Foshan Xianhu Laboratory of the Advanced Energy Science and Technology Guangdong Laboratory, Xianhu Hydrogen Valley, Foshan 528200, China

<sup>b</sup> State Key Laboratory of Advanced Technology for Materials Synthesis and Processing, School of Material Science and Engineering, International School of Material Science and Engineering, Wuhan University of Technology, Wuhan 430070, China

<sup>c</sup> Institute for Superconducting and Electronic Materials, Australian Institute of Innovative Materials, University of Wollongong, New South Wales 2500, Australia.

\* Corresponding author. E-mail: haohua@whut.edu.cn (H. Hao), shujun@uow.edu.au (S. Zhang).

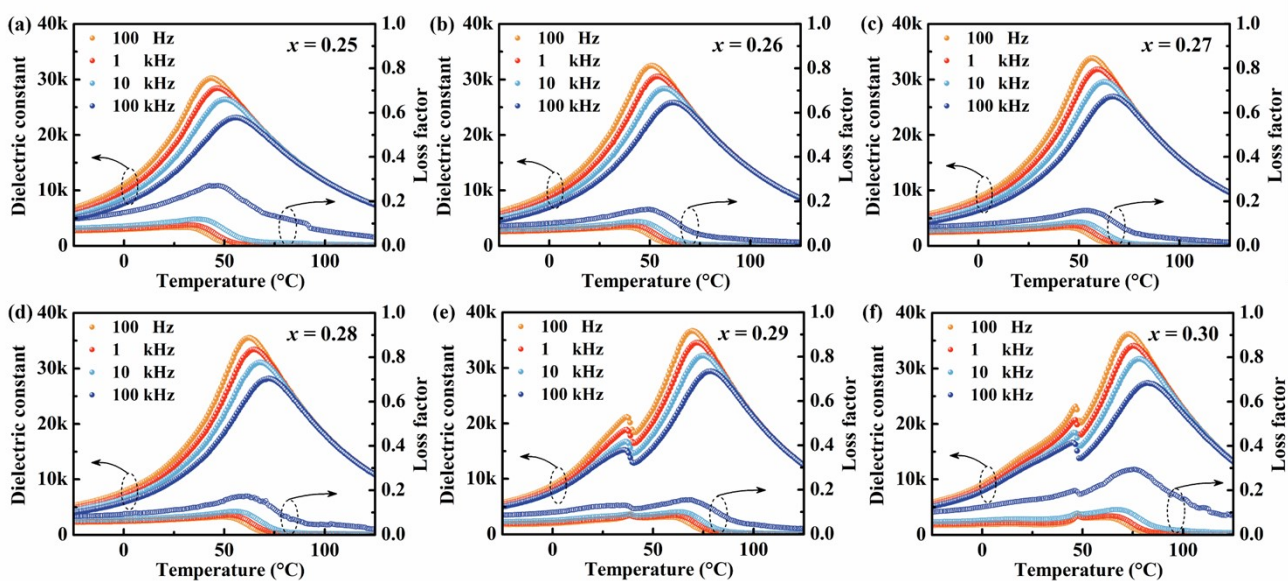

Fig. S1 The temperature and frequency dependence of dielectric permittivity and dielectric loss for 3%Nd-PMN-xPT ceramics: (a)  $x = 0.25$ , (b)  $x = 0.26$ , (c)  $x = 0.27$ , (d)  $x = 0.28$ , (e)  $x = 0.29$ , (f)  $x = 0.30$ .

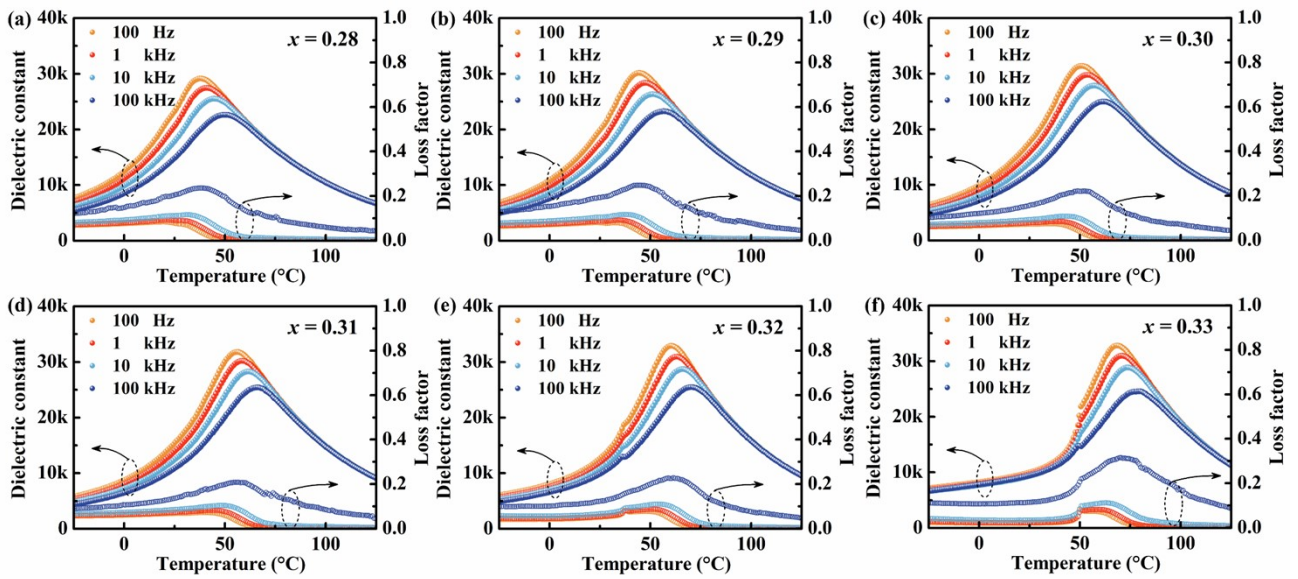

Fig. S2 The temperature and frequency dependence of dielectric permittivity and dielectric loss for 4%Nd-PMN- $x$ PT ceramics: (a)  $x = 0.28$ , (b)  $x = 0.29$ , (c)  $x = 0.30$ , (d)  $x = 0.31$ , (e)  $x = 0.32$ , (f)  $x = 0.33$ .

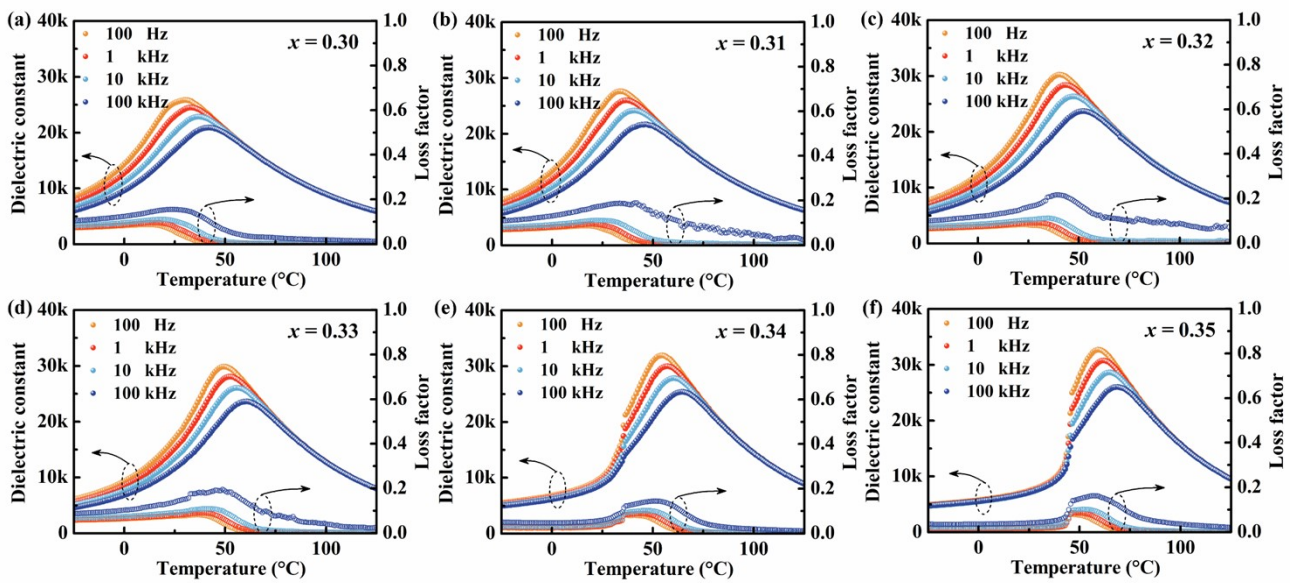

Fig. S3 The temperature and frequency dependence of dielectric permittivity and dielectric loss for 5%Nd-PMN- $x$ PT ceramics: (a)  $x = 0.30$ , (b)  $x = 0.31$ , (c)  $x = 0.32$ , (d)  $x = 0.33$ , (e)  $x = 0.34$ , (f)  $x = 0.35$ .

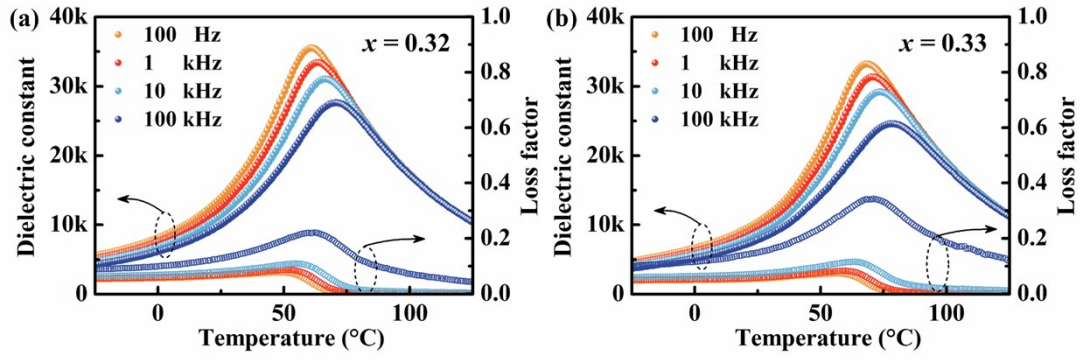

Fig. S4 The temperature dependence of dielectric permittivity and dielectric loss for unpoled (a) 4%Nd-PMN-0.32PT and (b) 4%Nd-PMN-0.33PT ceramic.

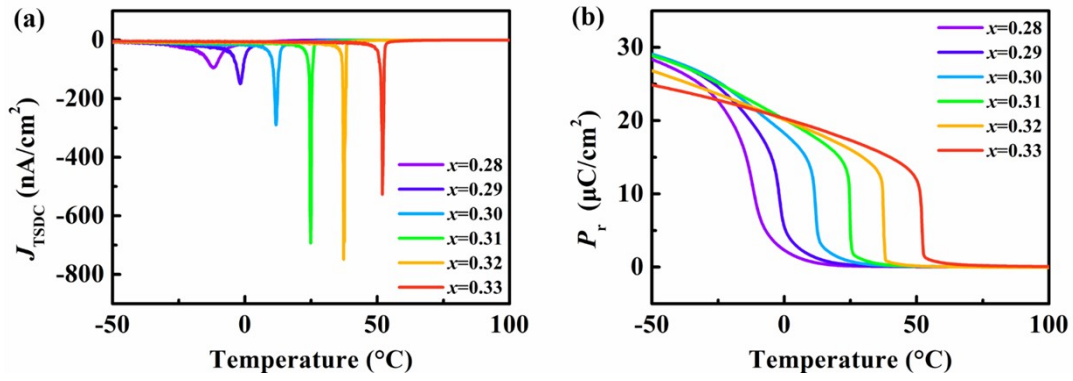

Fig. S5 The temperature stimulated depolarization current density  $J_{TSDC}$  and calculated remanent polarization  $P_r$  for 4%Nd-PMN- $x$ PT ceramics.

The remanent polarization  $P_r$  was calculated by the formula:

$$P_r = \int_0^T \frac{J}{r} dT$$

where  $J$ ,  $r$ ,  $T$  are the depolarization current density, heating rate, and temperature, respectively.

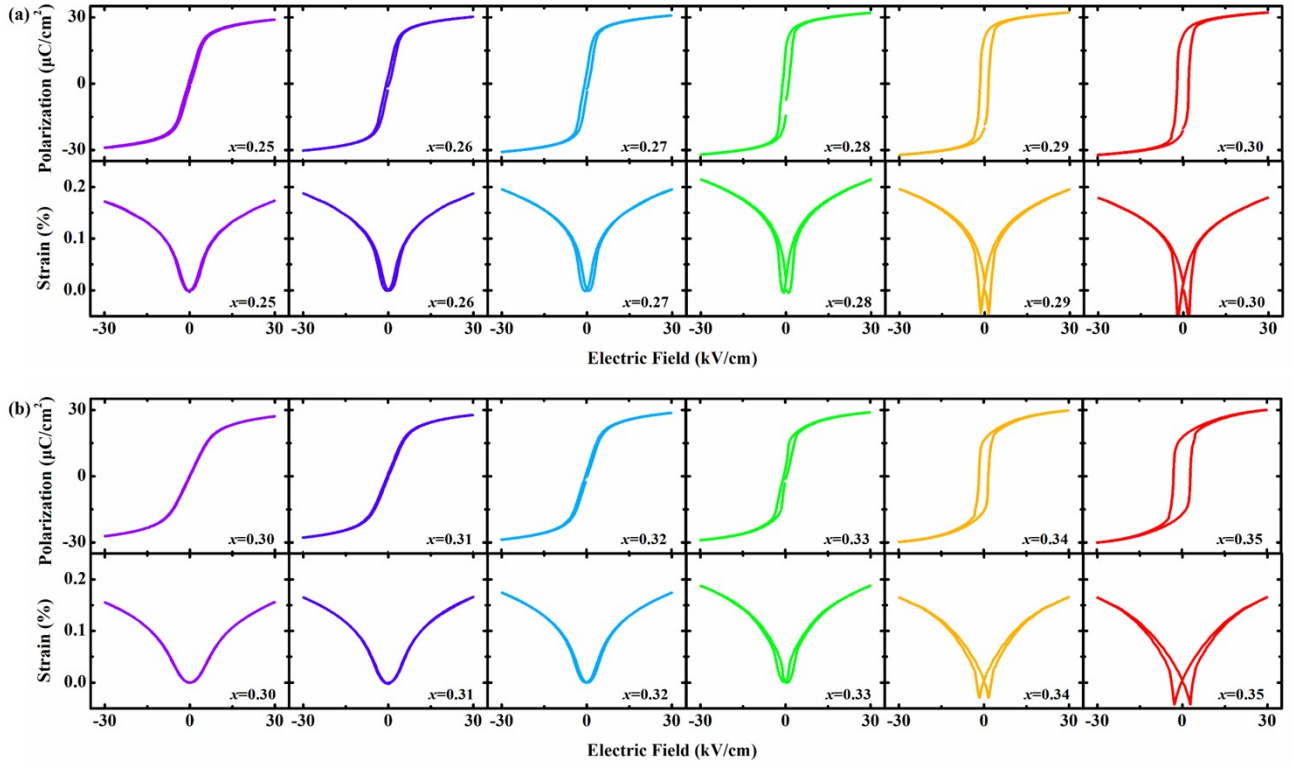

Fig. S6 The polarization-electric field ( $P$ - $E$ ) hysteresis loops and the bipolar strain-electric field ( $S$ - $E$ ) curves for (a) 3%Nd-PMN- $x$ PT ceramics and (b) 5%Nd-PMN- $x$ PT ceramics.

Table S1 The dielectric, piezoelectric and strain properties of yNd-PMN-xPT ferroelectric ceramics

| Composition     | $\epsilon_r$<br>(1kHz) | $\tan \delta$<br>(%) | $T_C$<br>(°C) | $T_{nr}$<br>(°C) | $d_{33}$<br>(pC/N) | $\Delta T_m$<br>(°C) | $S_{max}$<br>(%) |
|-----------------|------------------------|----------------------|---------------|------------------|--------------------|----------------------|------------------|
| 3%Nd-PMN-0.25PT | 18230                  | 9.0                  | 46            | -                | -                  | 12.1                 | 0.178            |
| 3%Nd-PMN-0.26PT | 15800                  | 8.4                  | 52            | -                | -                  | 11.0                 | 0.189            |
| 3%Nd-PMN-0.27PT | 14020                  | 7.6                  | 58            | -                | -                  | 10.6                 | 0.195            |
| 3%Nd-PMN-0.28PT | 12520                  | 6.9                  | 64            | -                | -                  | 10.5                 | 0.210            |
| 3%Nd-PMN-0.29PT | 15510                  | 6.7                  | 71            | 37               | 820                | 9.3                  | 0.195            |
| 3%Nd-PMN-0.30PT | 14330                  | 5.3                  | 76            | 46               | 1270               | 8.9                  | 0.179            |
| 4%Nd-PMN-0.28PT | 20620                  | 9.3                  | 40            | -                | -                  | 12.3                 | 0.186            |
| 4%Nd-PMN-0.29PT | 17630                  | 8.7                  | 46            | -                | -                  | 11.6                 | 0.194            |
| 4%Nd-PMN-0.30PT | 15920                  | 7.7                  | 53            | -                | -                  | 10.8                 | 0.201            |
| 4%Nd-PMN-0.31PT | 14050                  | 7.2                  | 58            | -                | -                  | 10.1                 | 0.217            |
| 4%Nd-PMN-0.32PT | 11750                  | 5.4                  | 63            | 37               | 430                | 9.7                  | 0.198            |
| 4%Nd-PMN-0.33PT | 9740                   | 2.3                  | 70            | 50               | 890                | 9.2                  | 0.188            |
| 5%Nd-PMN-0.30PT | 23050                  | 7.7                  | 32            | -                | -                  | 12.5                 | 0.155            |
| 5%Nd-PMN-0.31PT | 22370                  | 8.8                  | 36            | -                | -                  | 11.5                 | 0.165            |
| 5%Nd-PMN-0.32PT | 20320                  | 9.0                  | 43            | -                | -                  | 11.3                 | 0.173            |
| 5%Nd-PMN-0.33PT | 16430                  | 8.0                  | 51            | -                | -                  | 10.8                 | 0.187            |
| 5%Nd-PMN-0.34PT | 9930                   | 3.4                  | 56            | 36               | 220                | 10.3                 | 0.168            |
| 5%Nd-PMN-0.35PT | 7350                   | 1.8                  | 61            | 46               | 450                | 9.5                  | 0.163            |
